# Supplementary material for: Component match in rhodium catalyzed three-component reactions of ethyl diazoacetate, H2O and aryl imines: a highly diastereoselective one-step synthesis of β-aryl isoserine derivatives
Source: Royal Society of Chemistry journal article supplement (doi:10.1039/b915013g), 2009-01-01

**Component match in rhodium catalyzed three-component reactions of ethyl diazoacetate, H<sub>2</sub>O and aryl imines: diastereoselective one-step synthesis of  $\beta$ -aryl isoserine derivatives**

*Zhenqiu Guo, Taoda Shi, Jun Jiang, Liping Yang, Wenhao Hu\**

*Department of Chemistry, East China Normal University, Shanghai 200062 (P.R. China)*

*Fax: (+86) 21-6223-3176*

*E-mail: [whu@chem.ecnu.edu.cn](mailto:whu@chem.ecnu.edu.cn)*

**Supporting Information**

Copies of <sup>1</sup>H and <sup>13</sup>C NMR spectra:

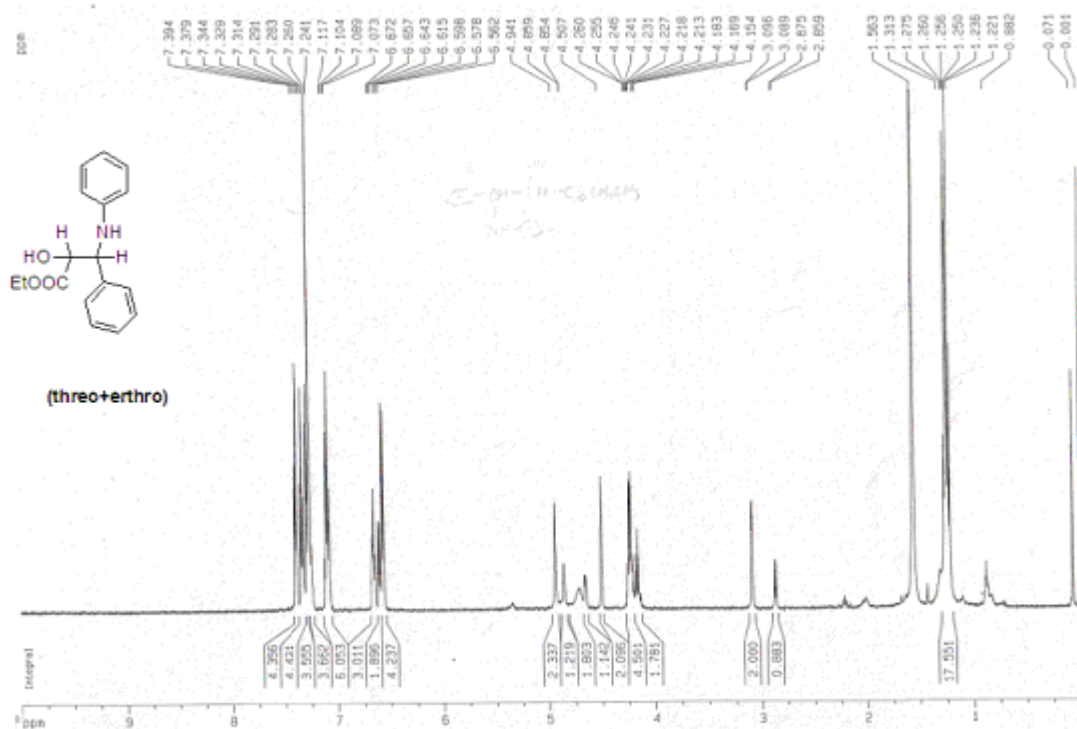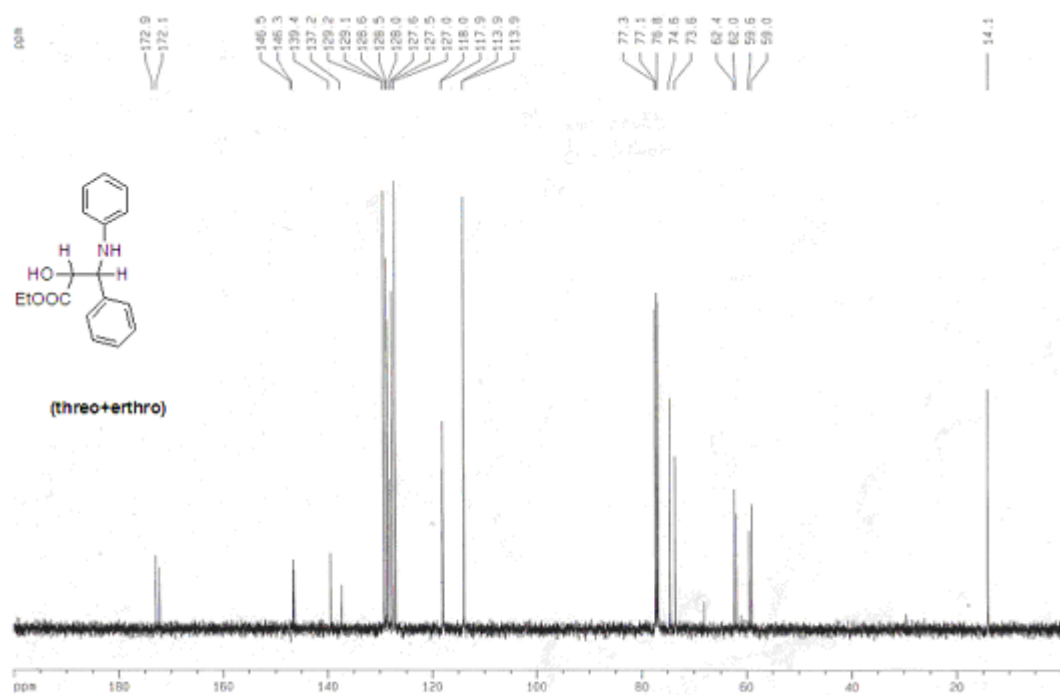

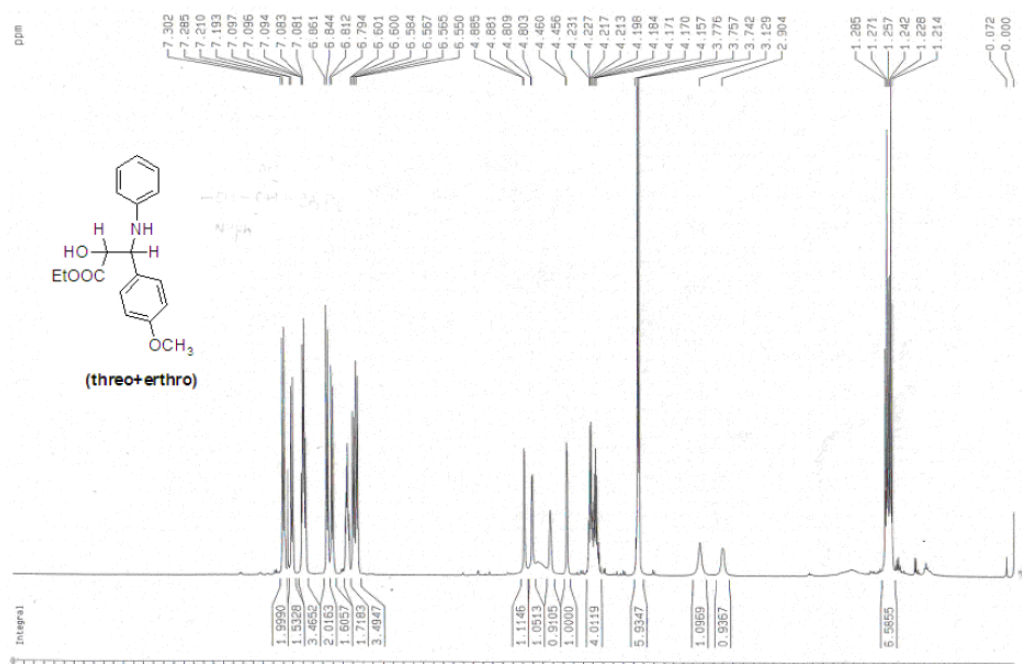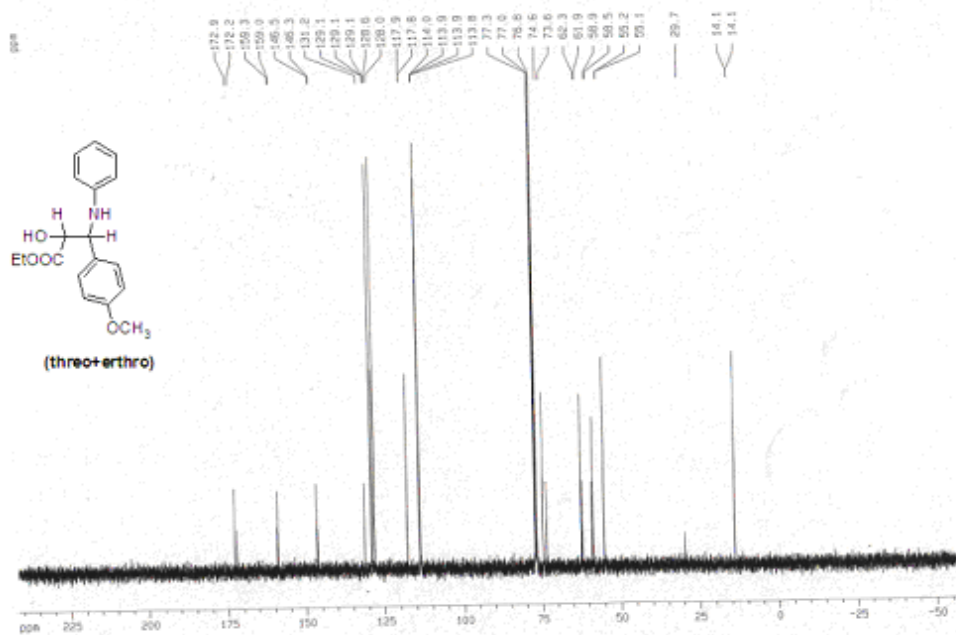

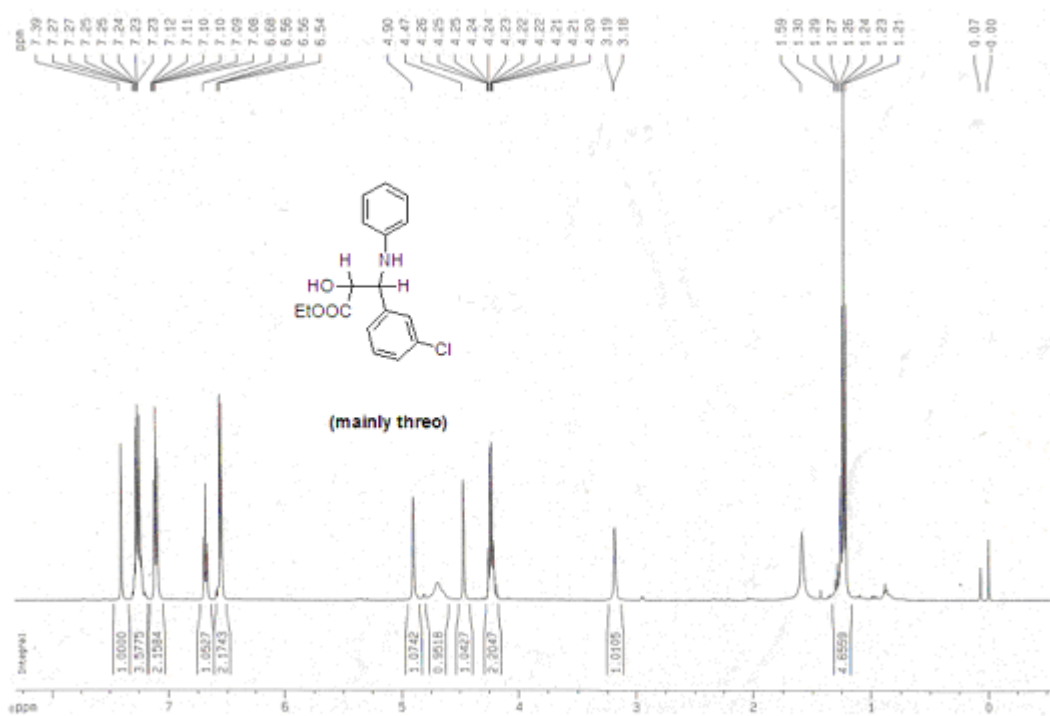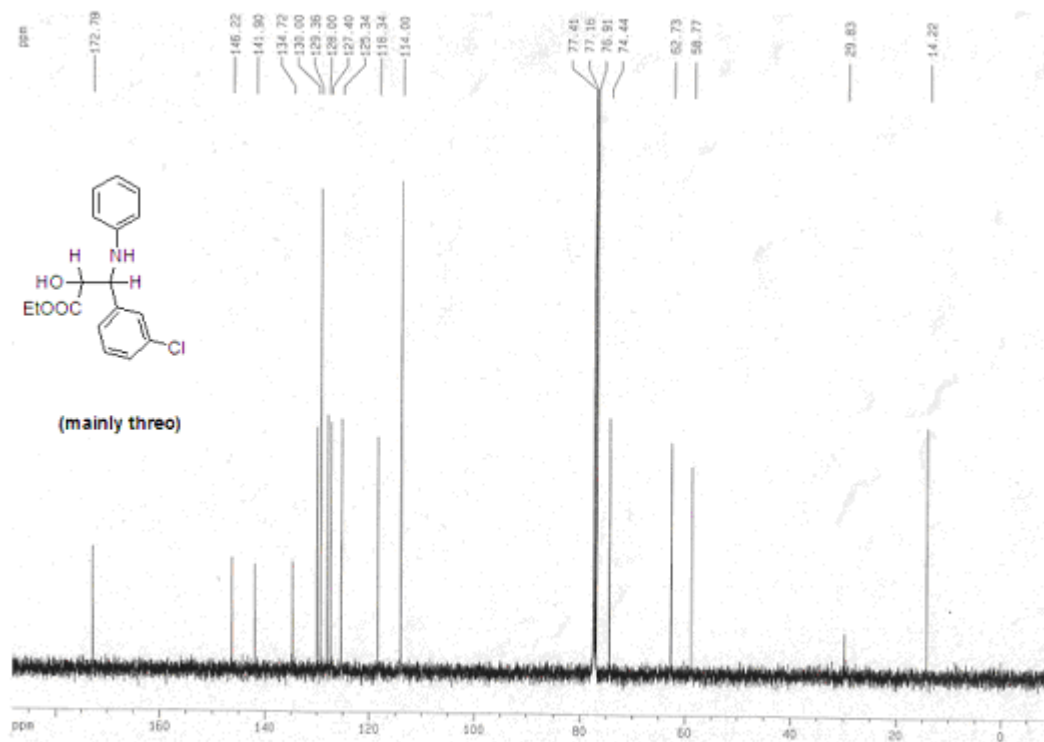

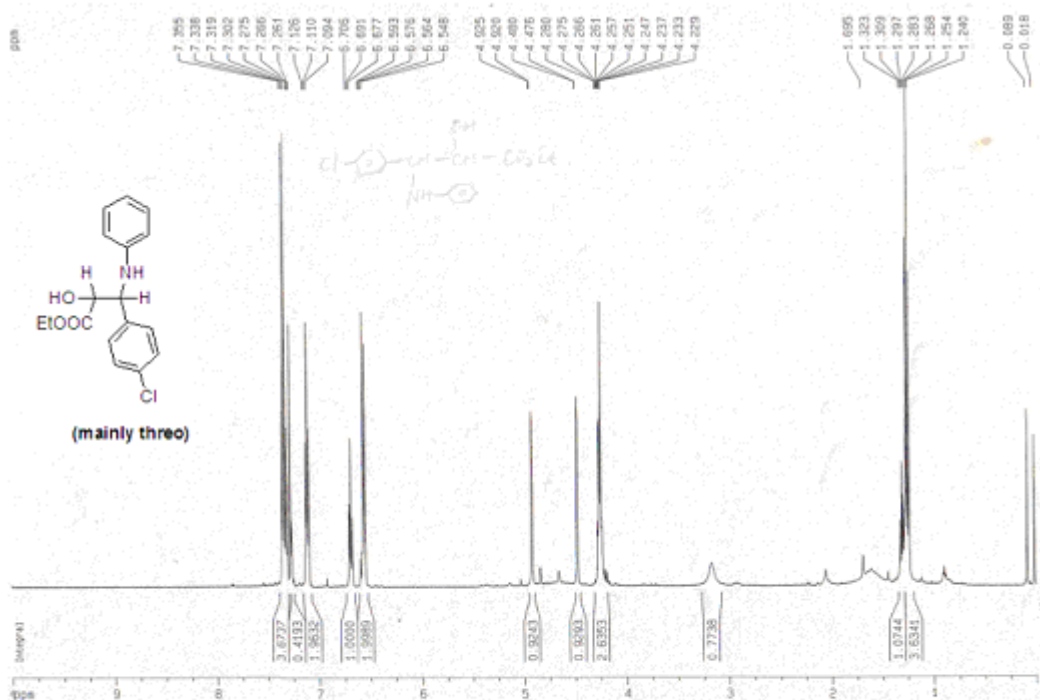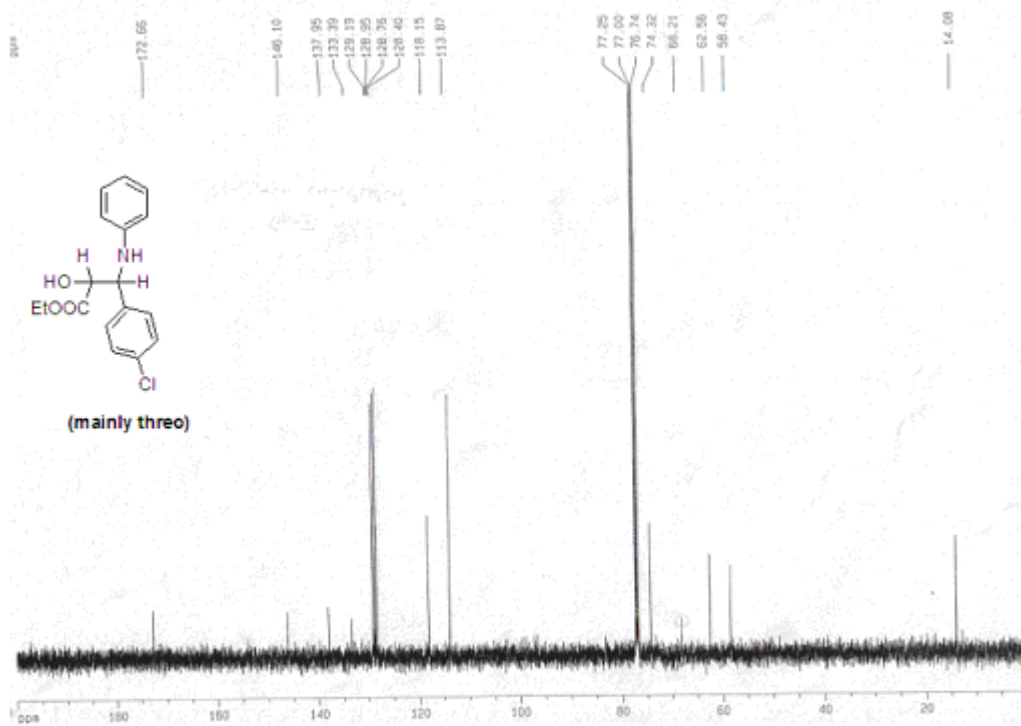



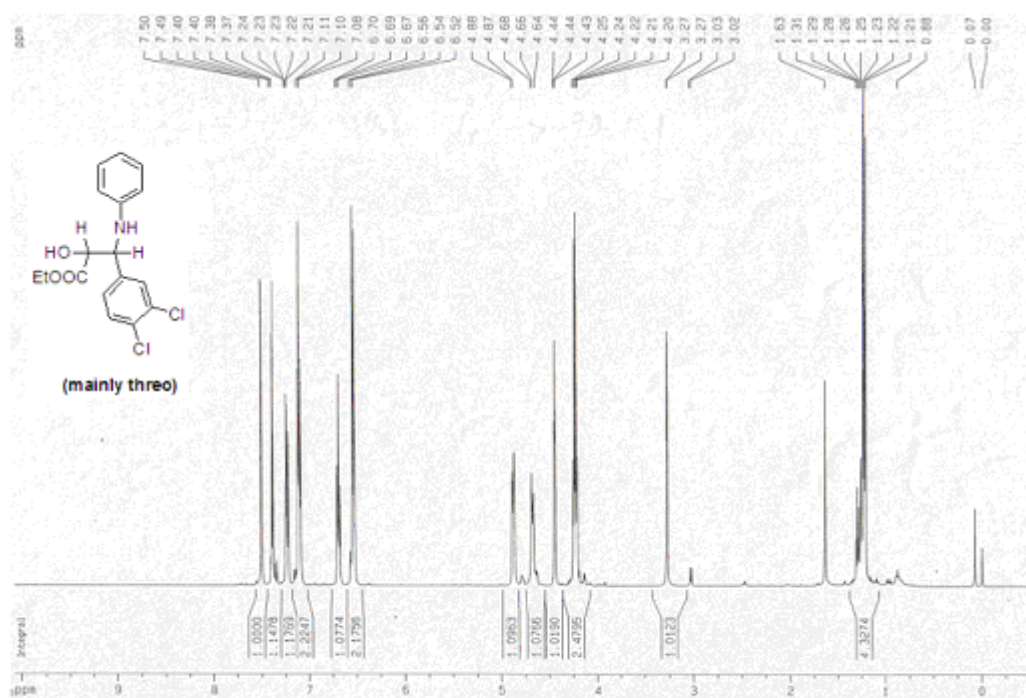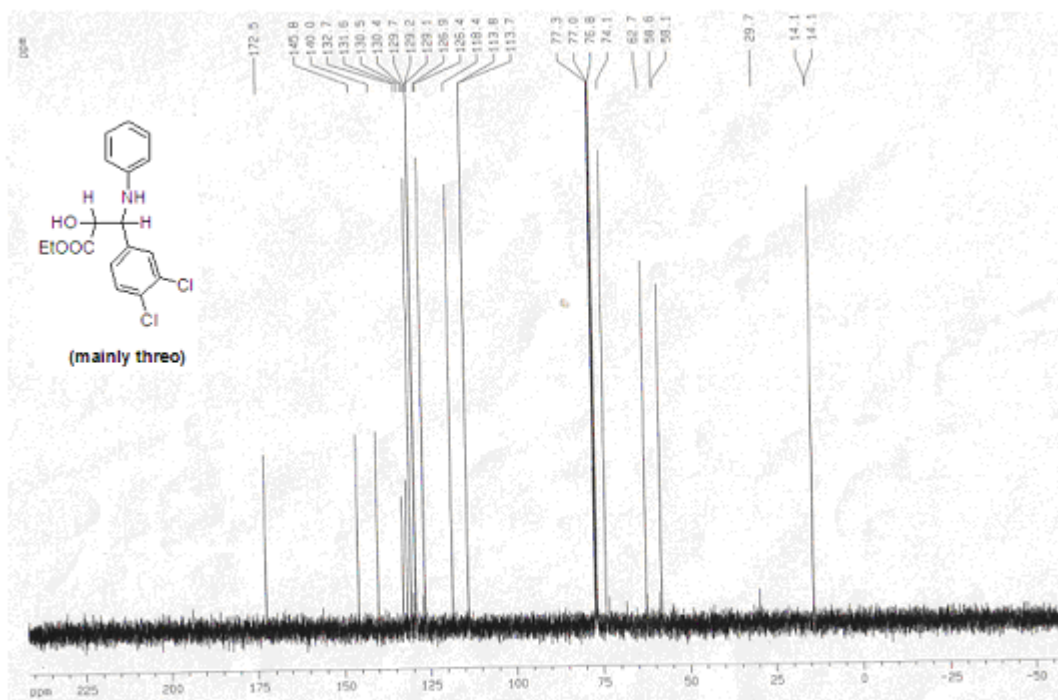

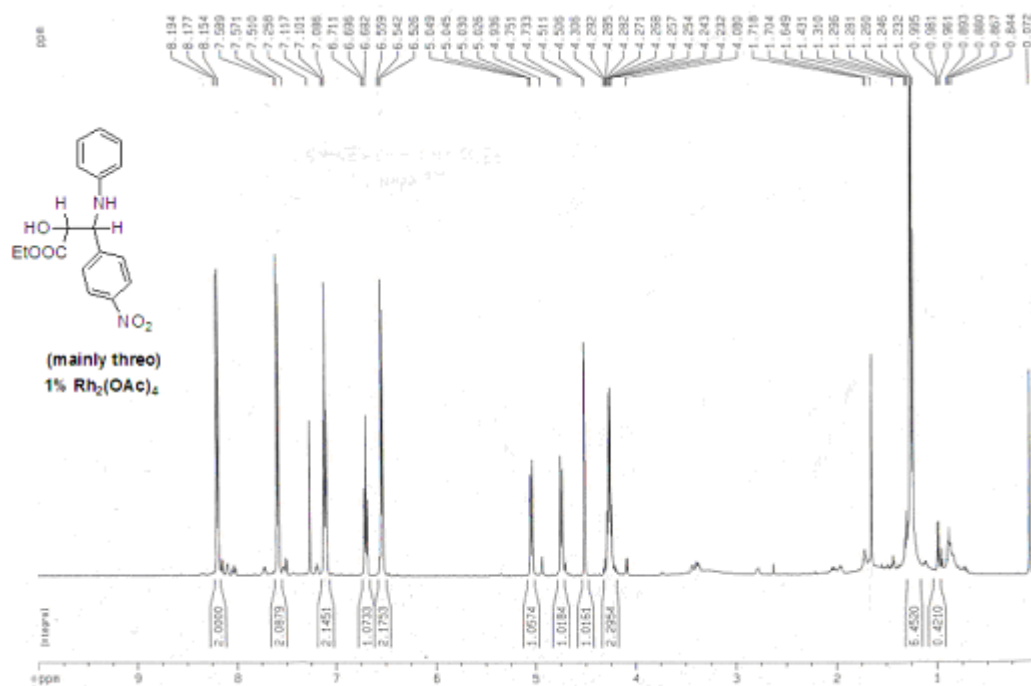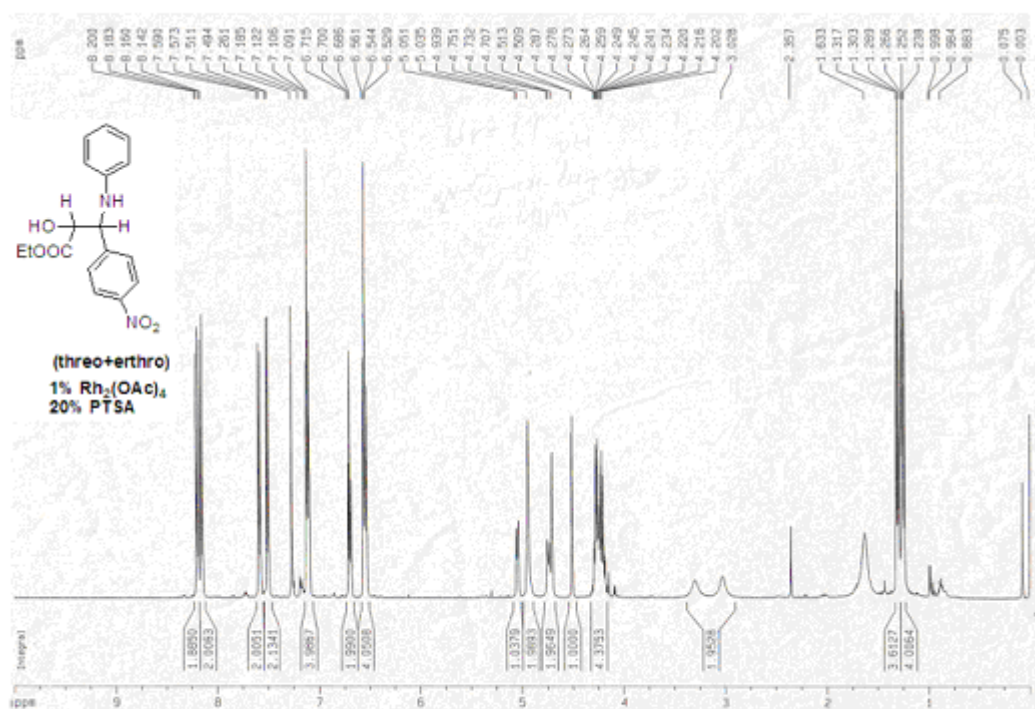



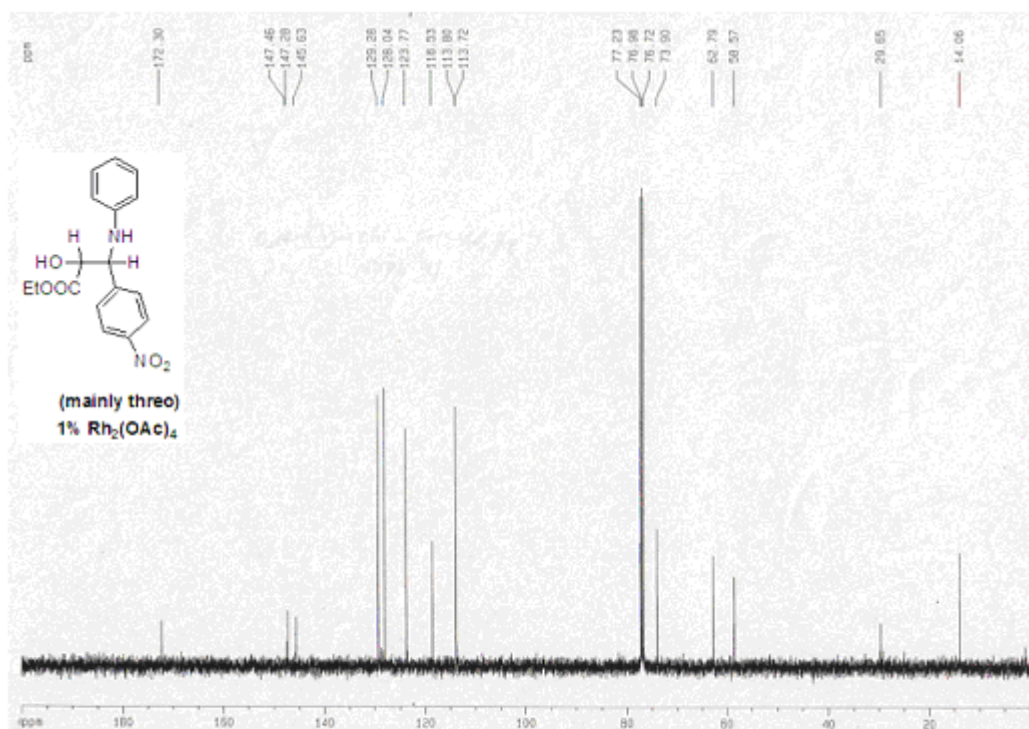

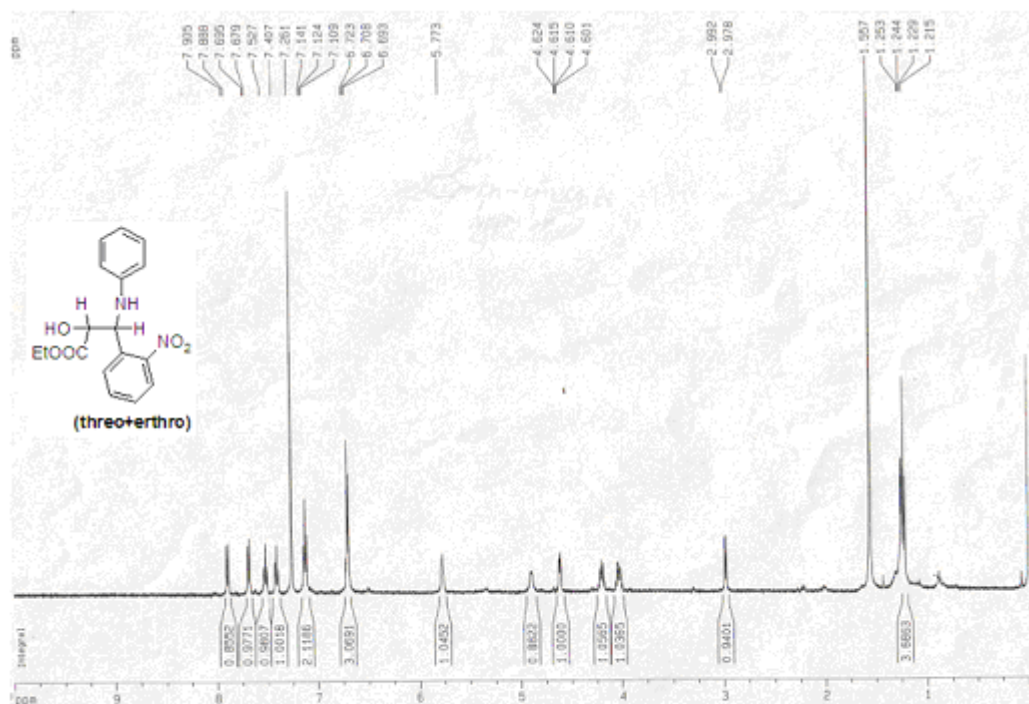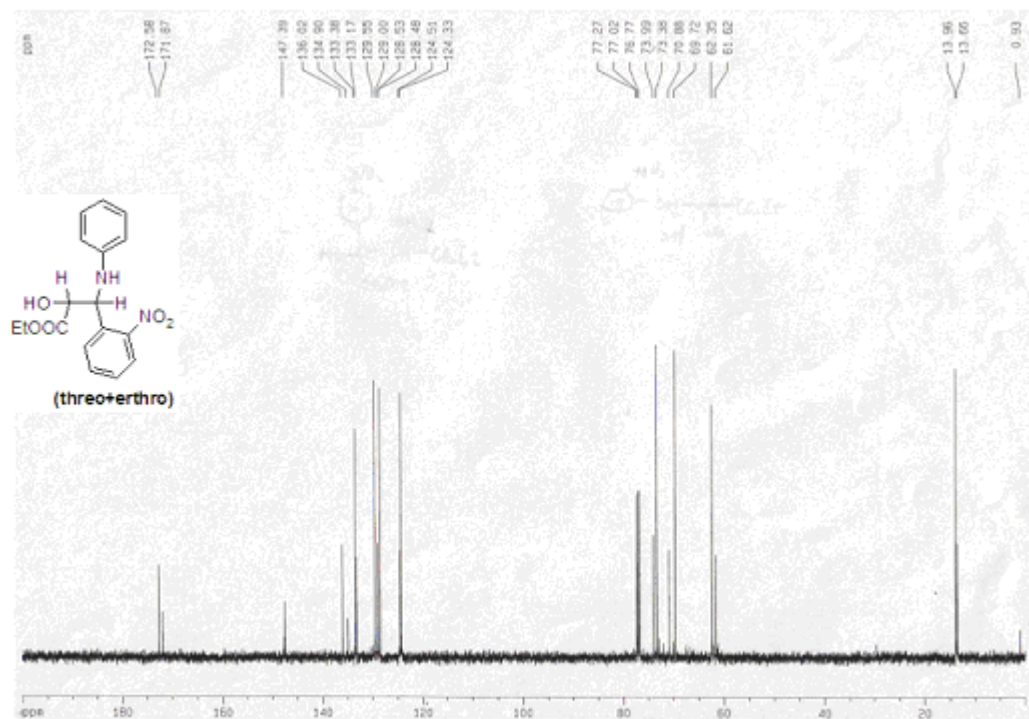

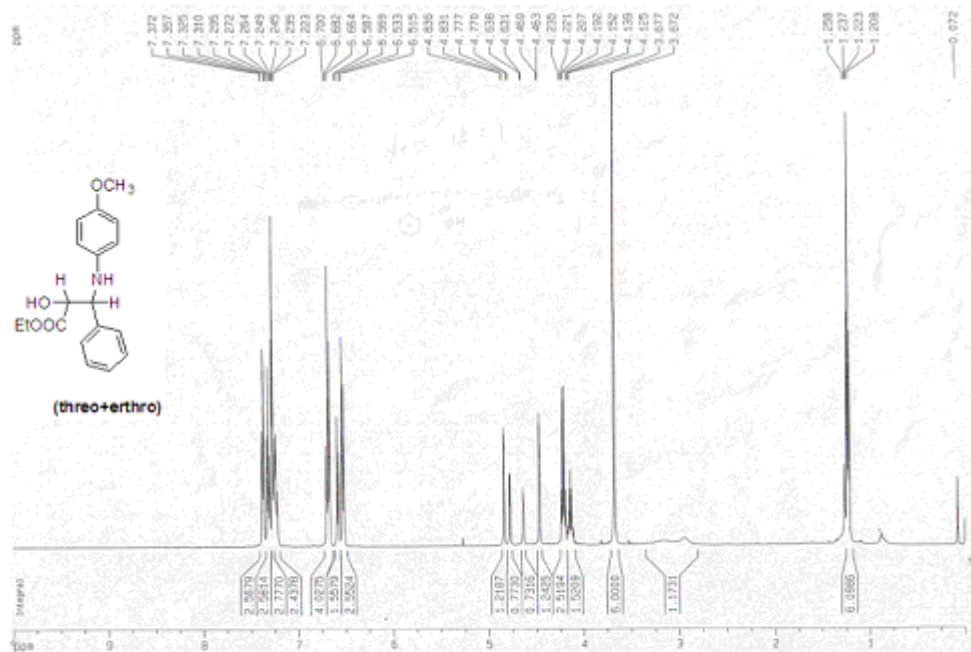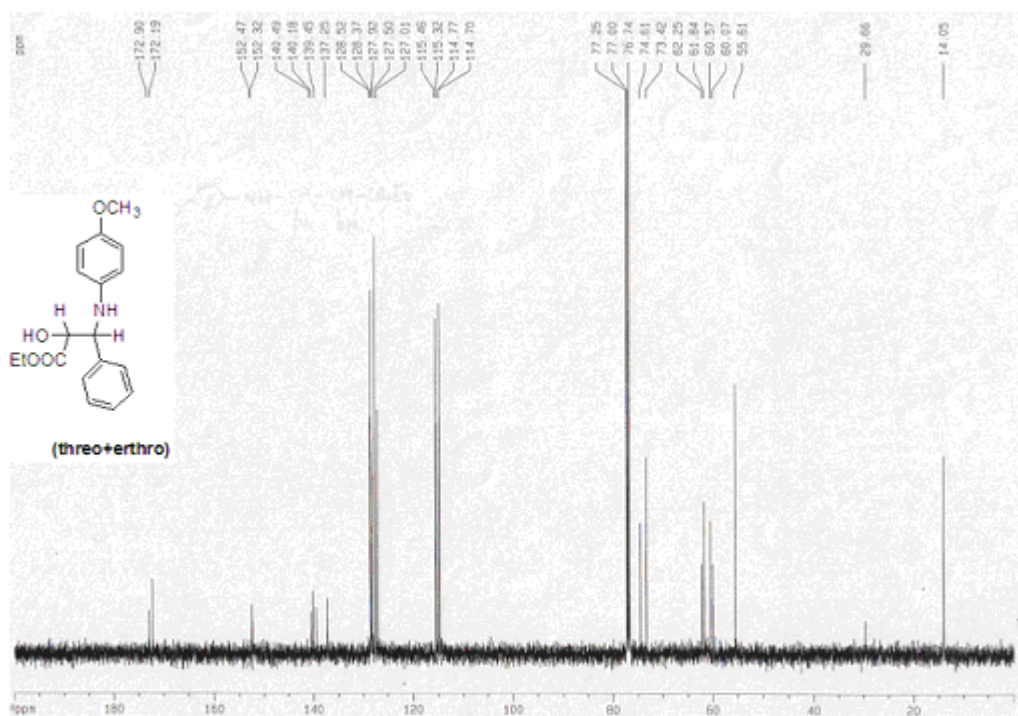

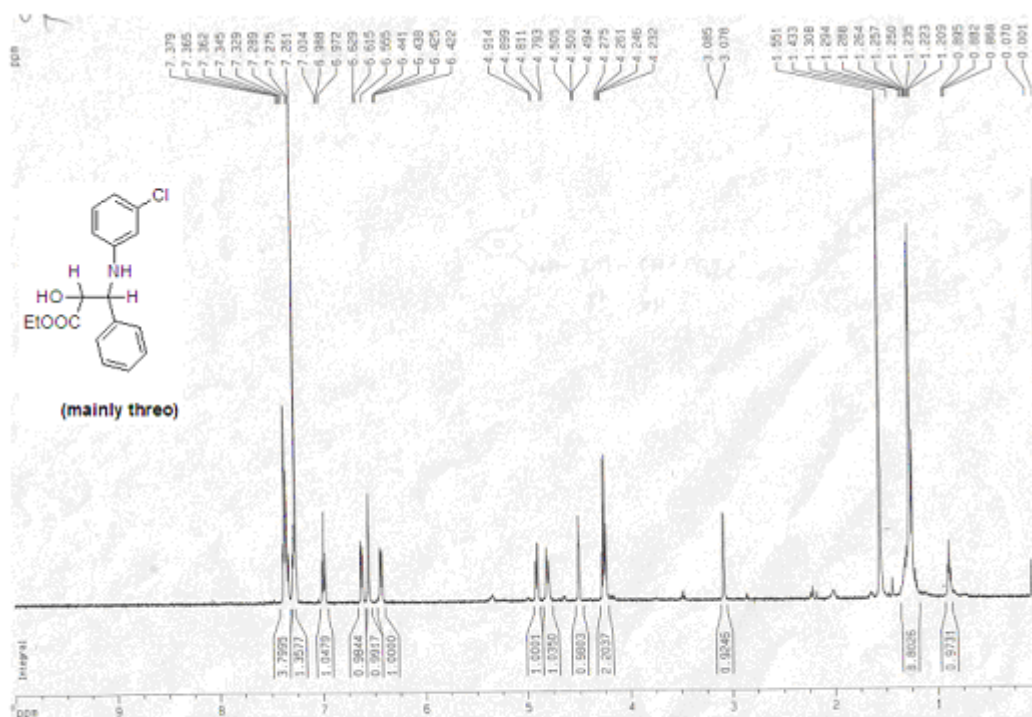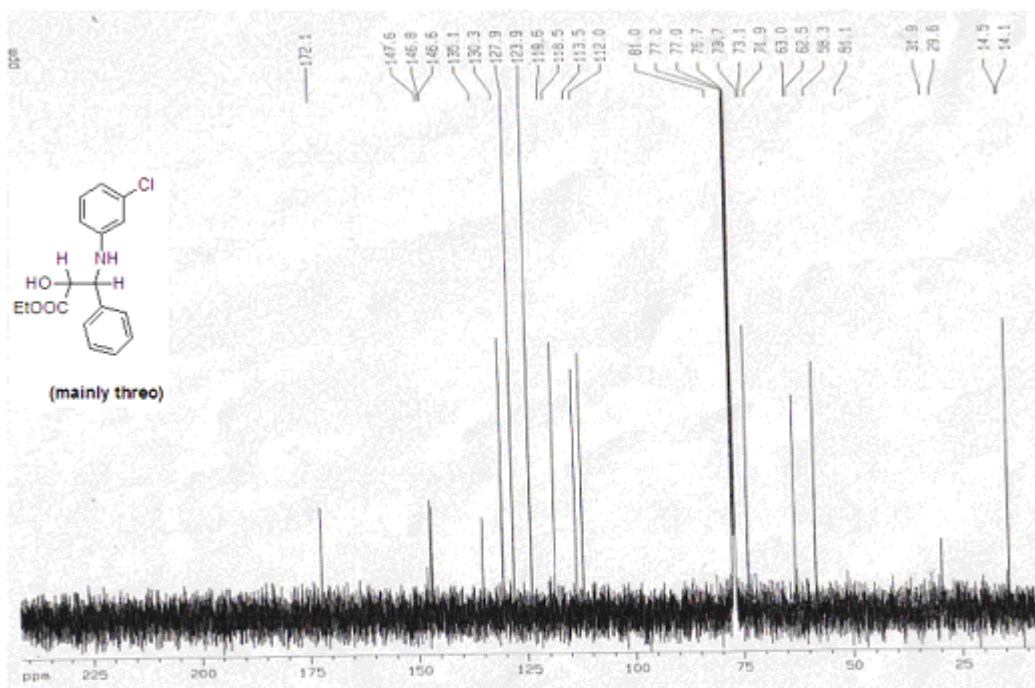

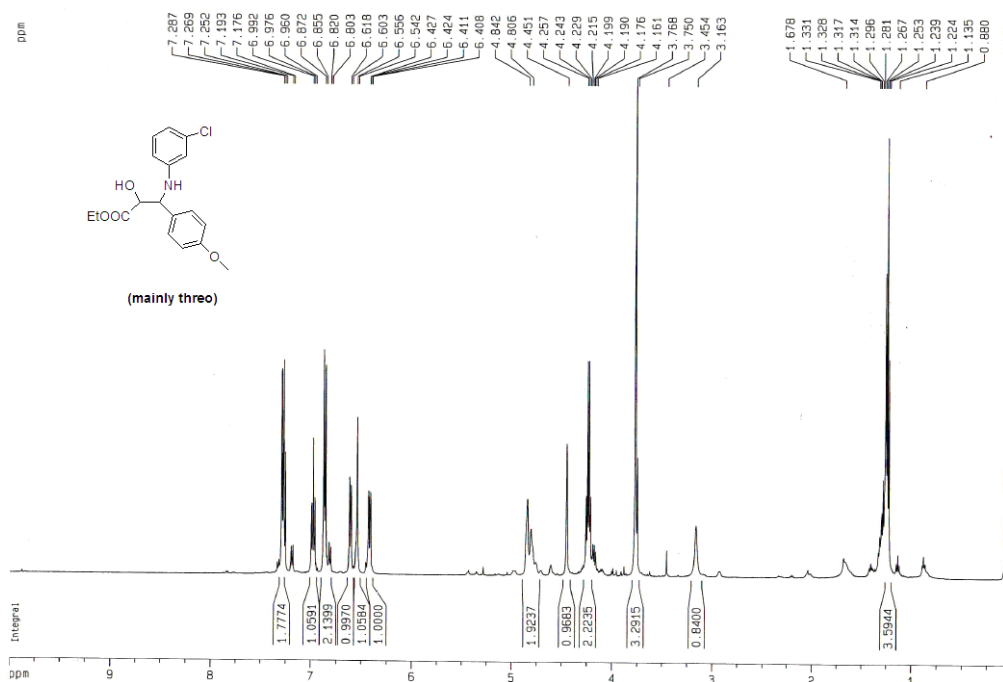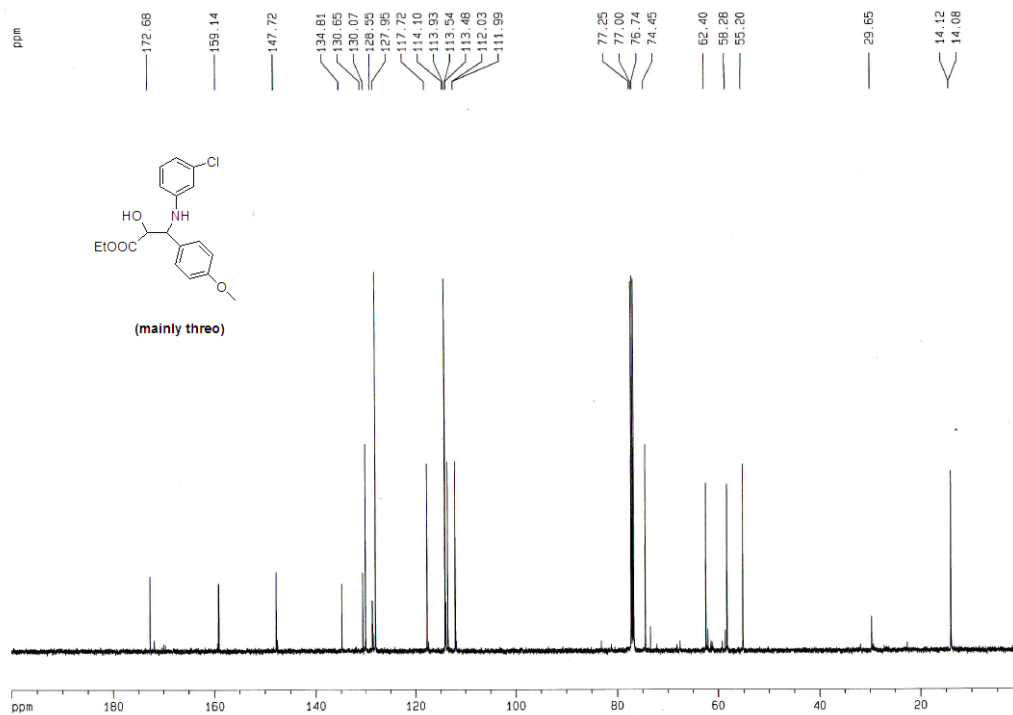

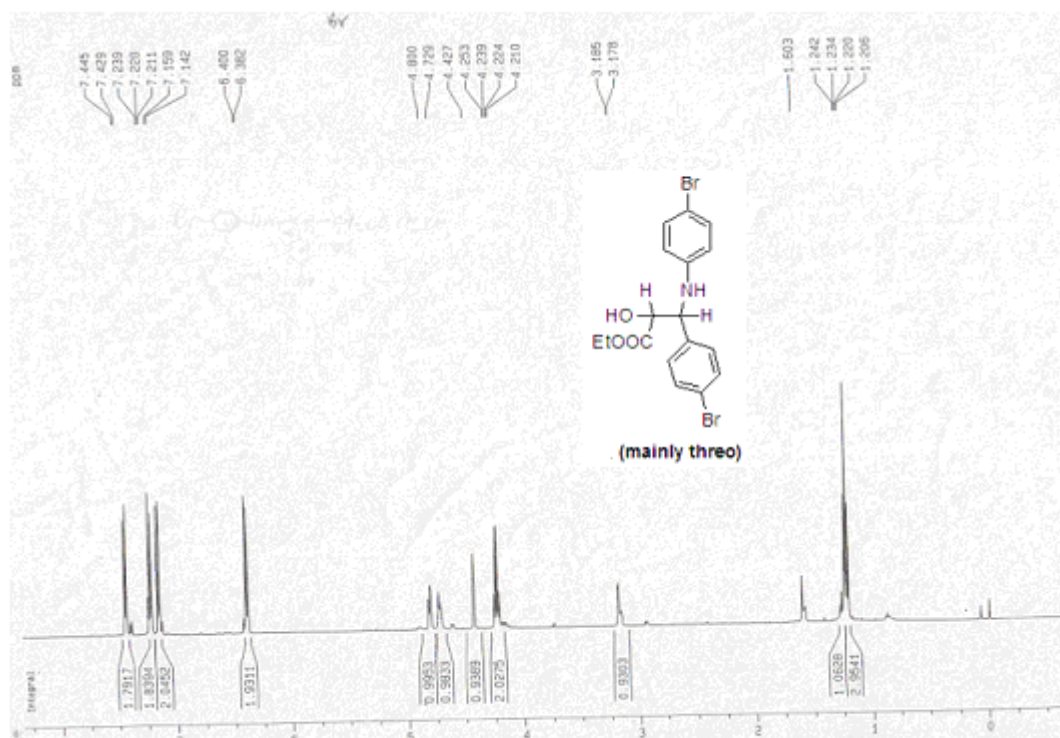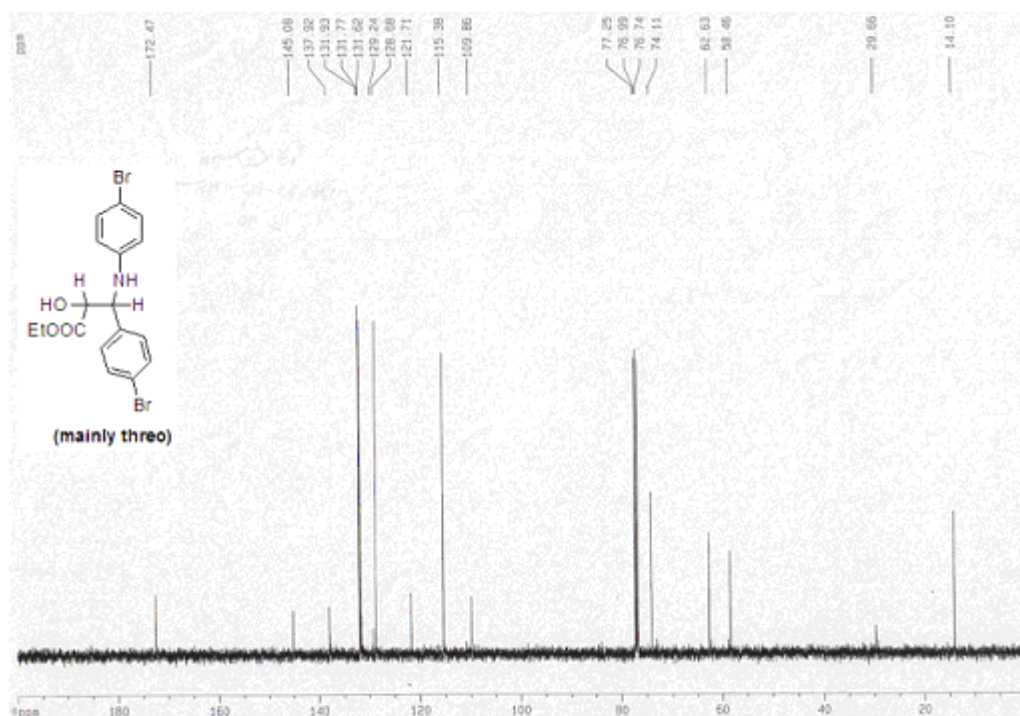

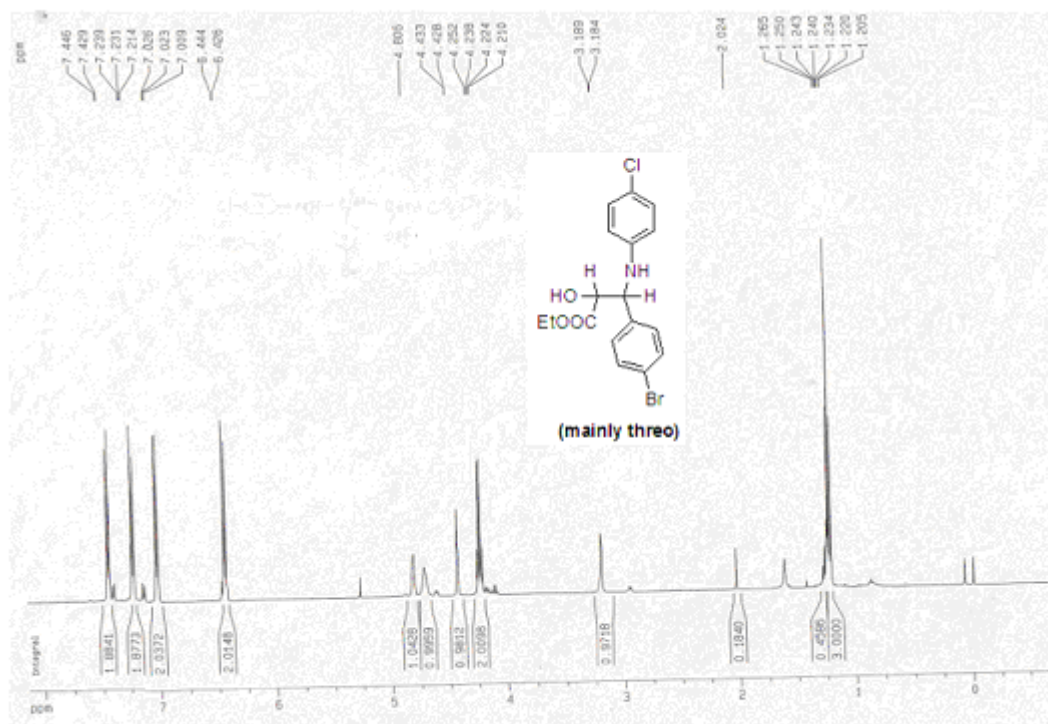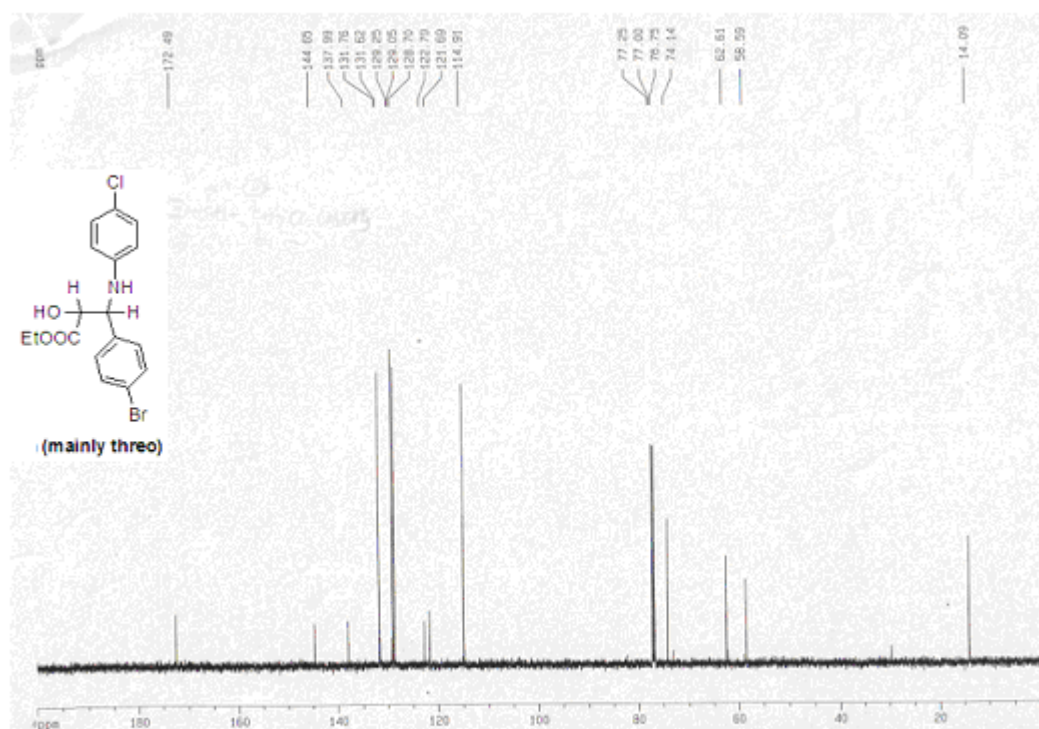

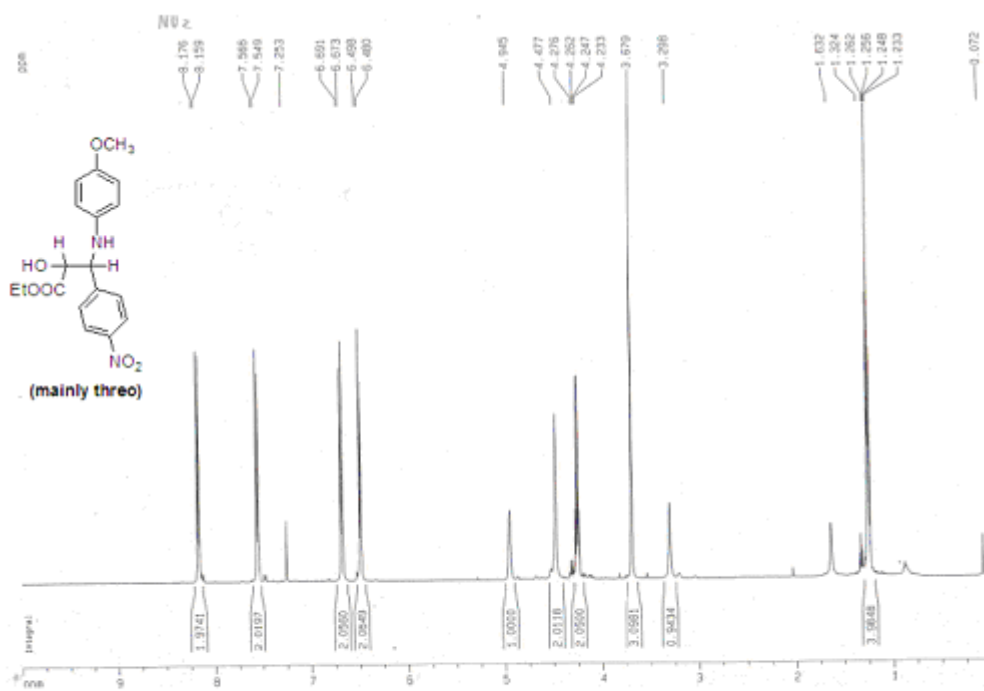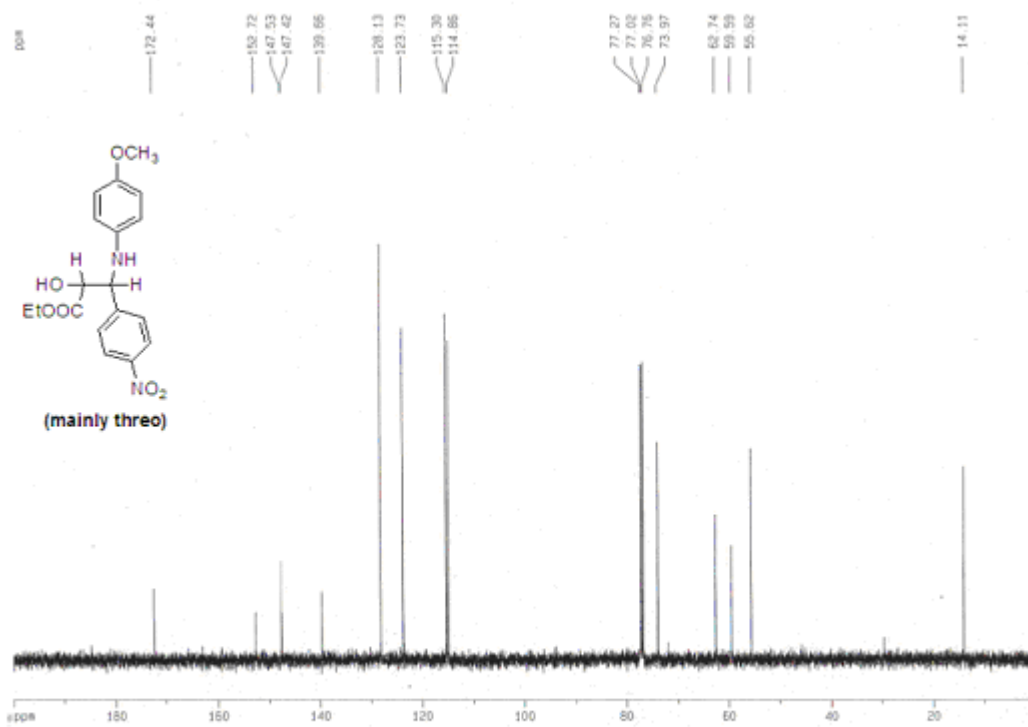



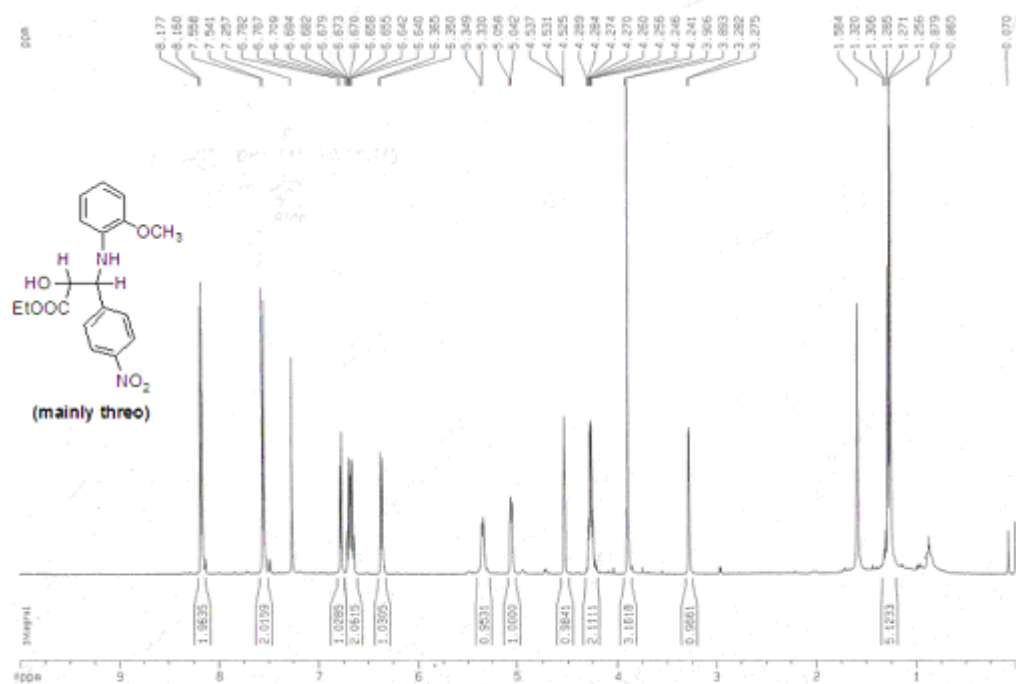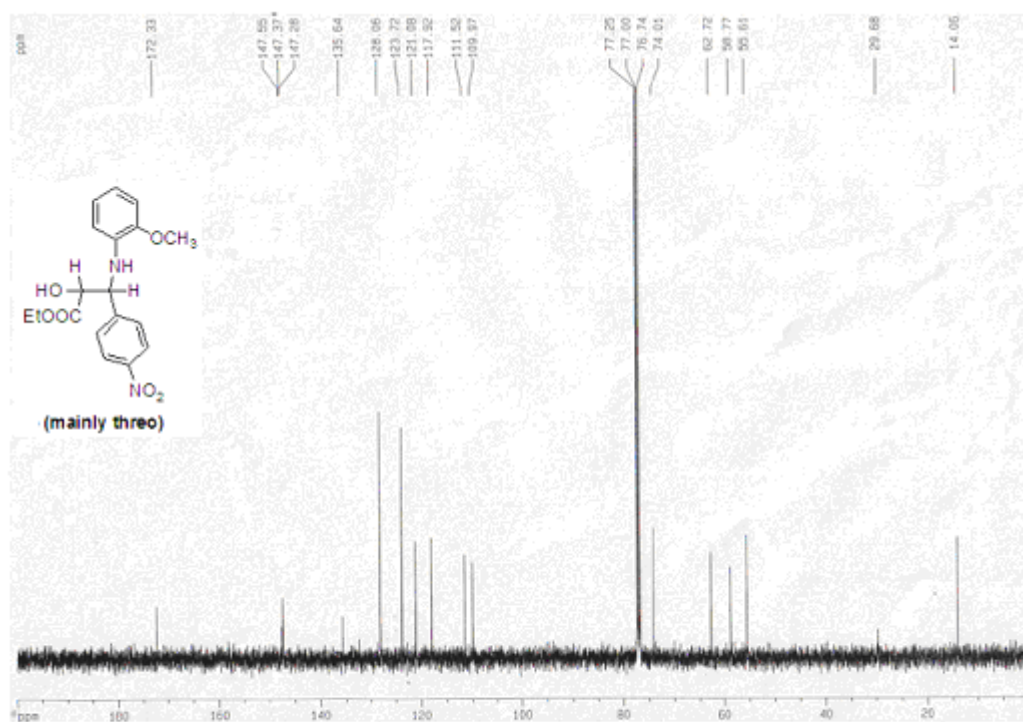

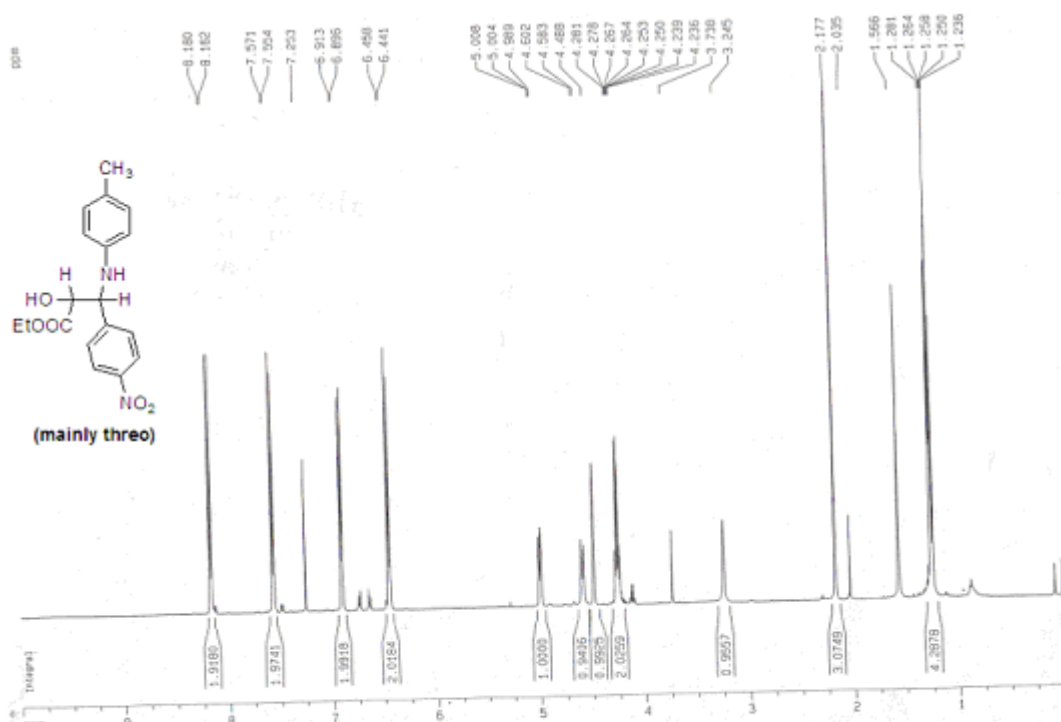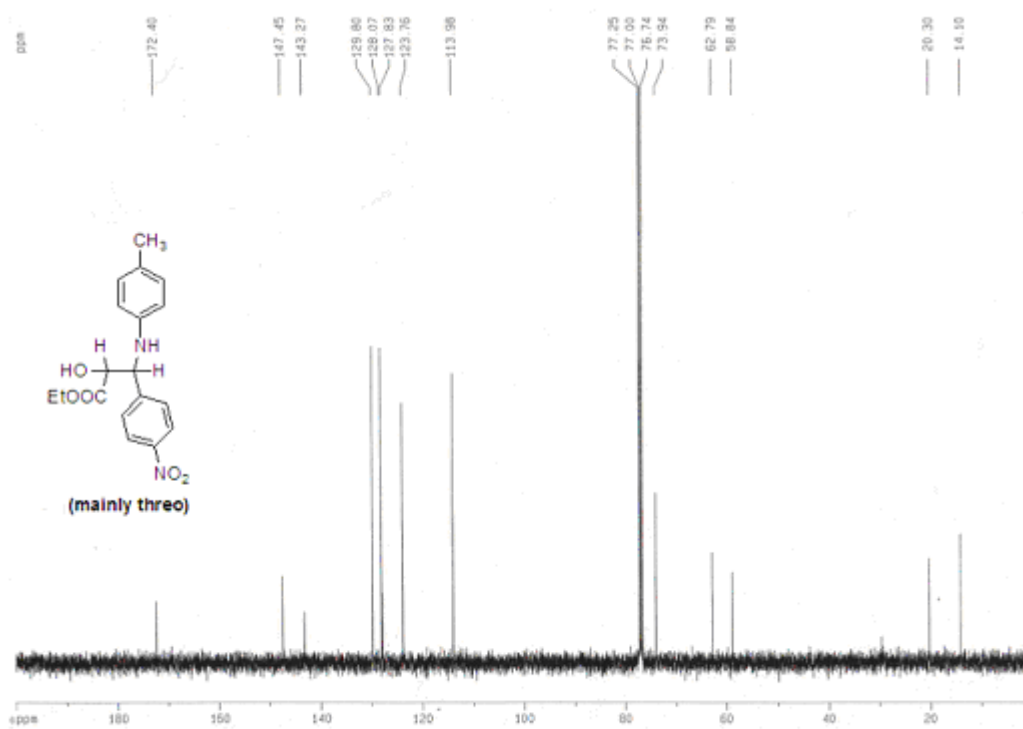

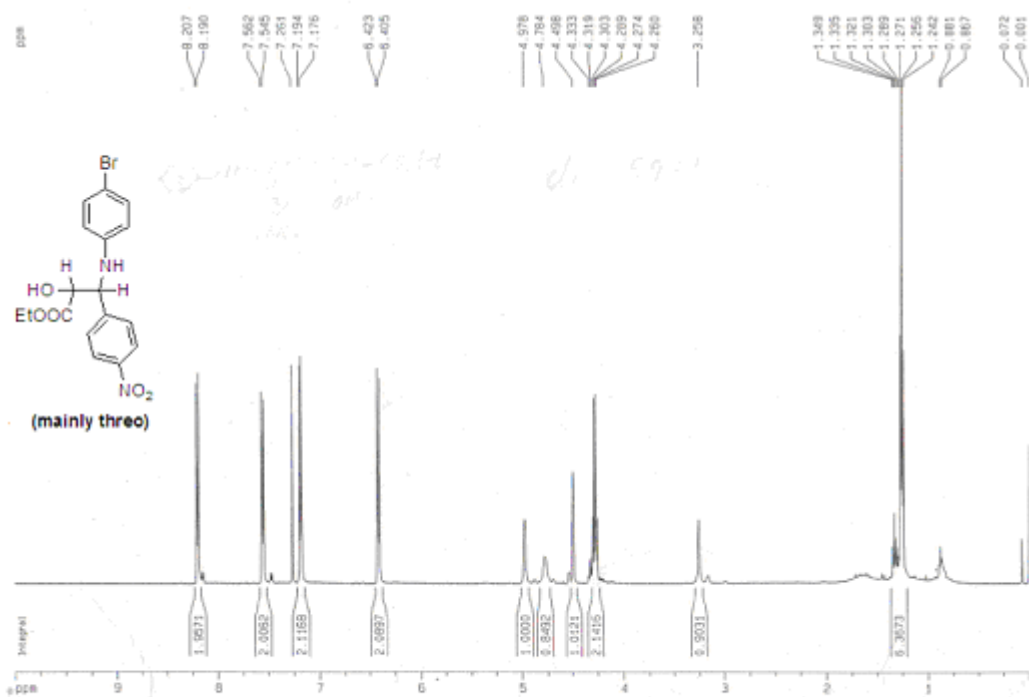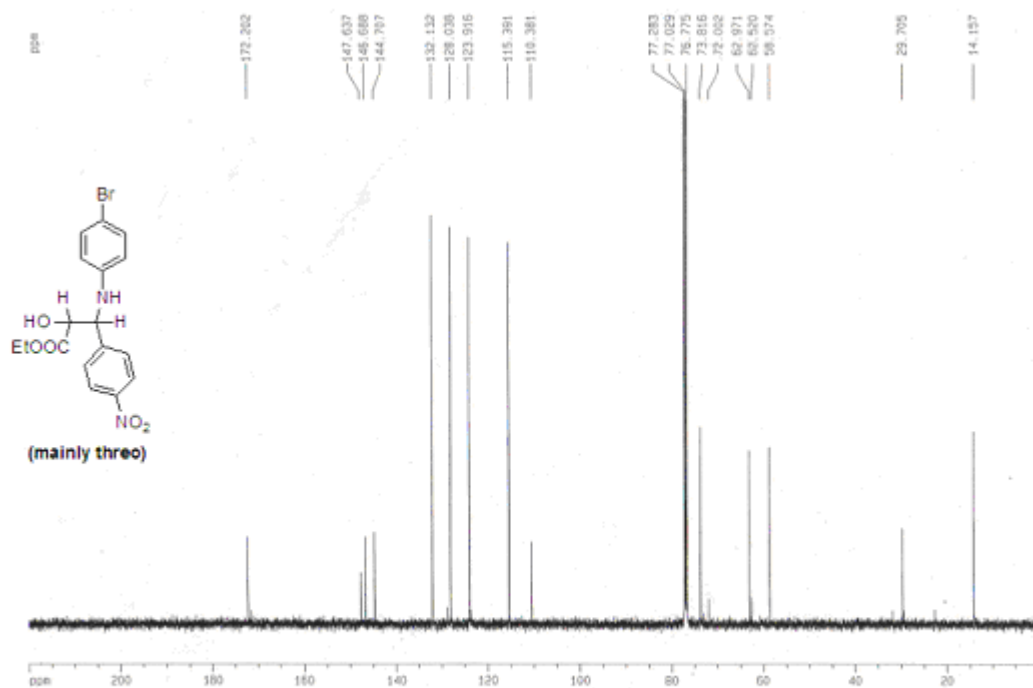

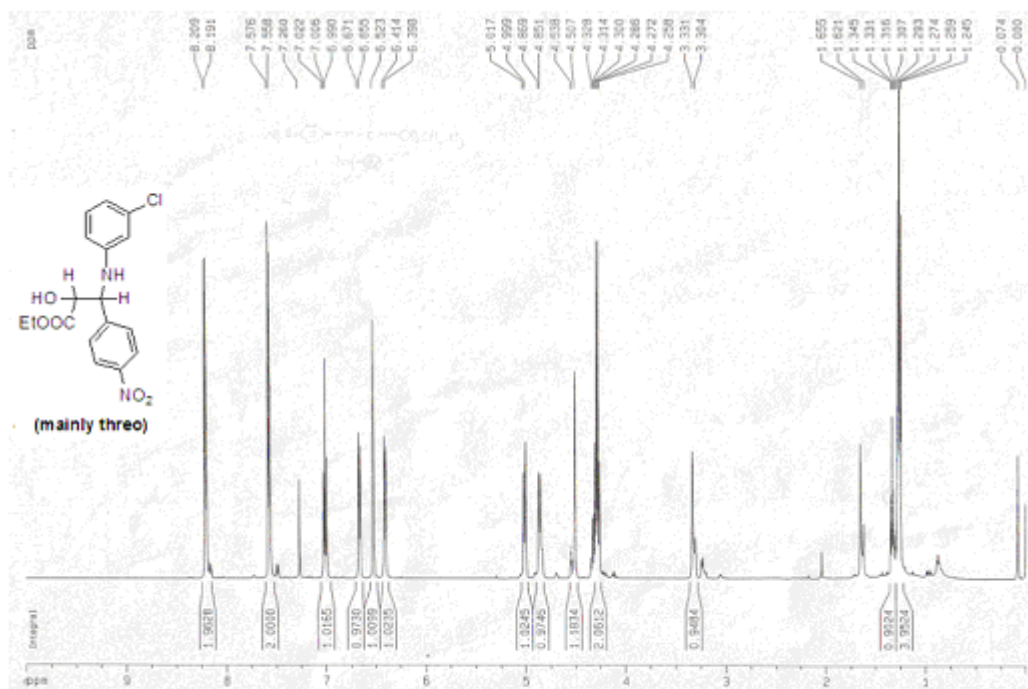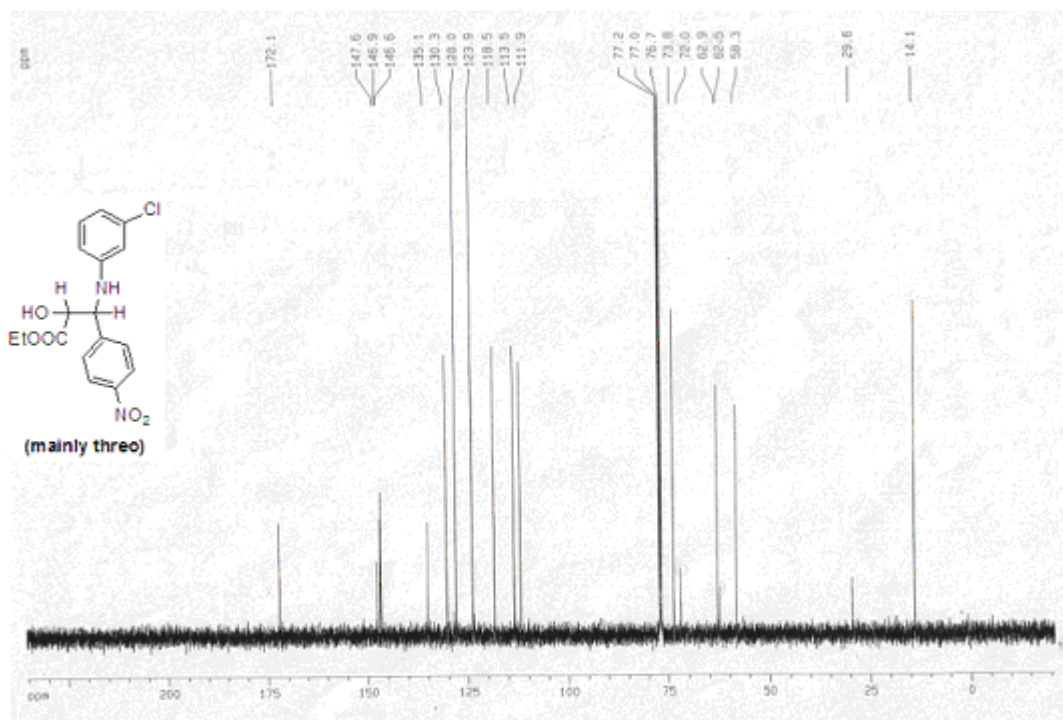

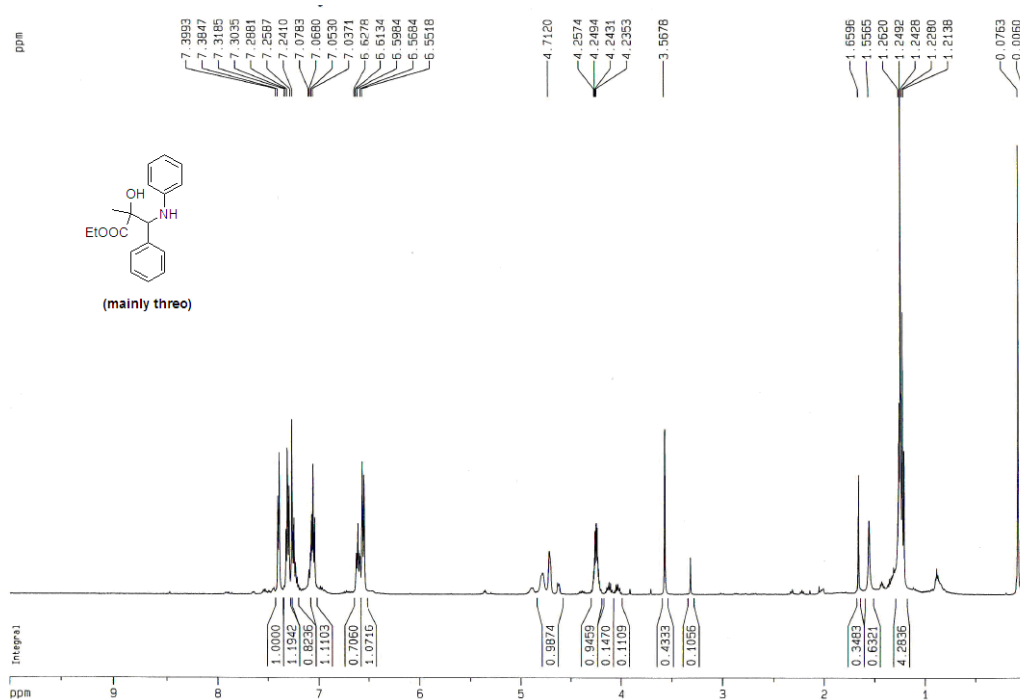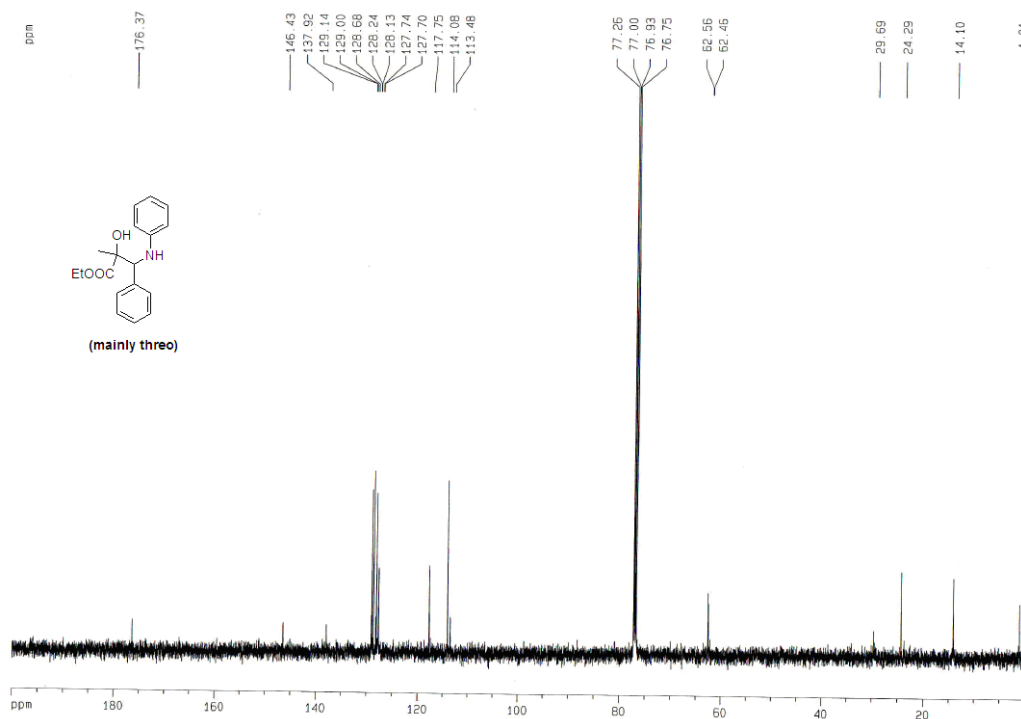

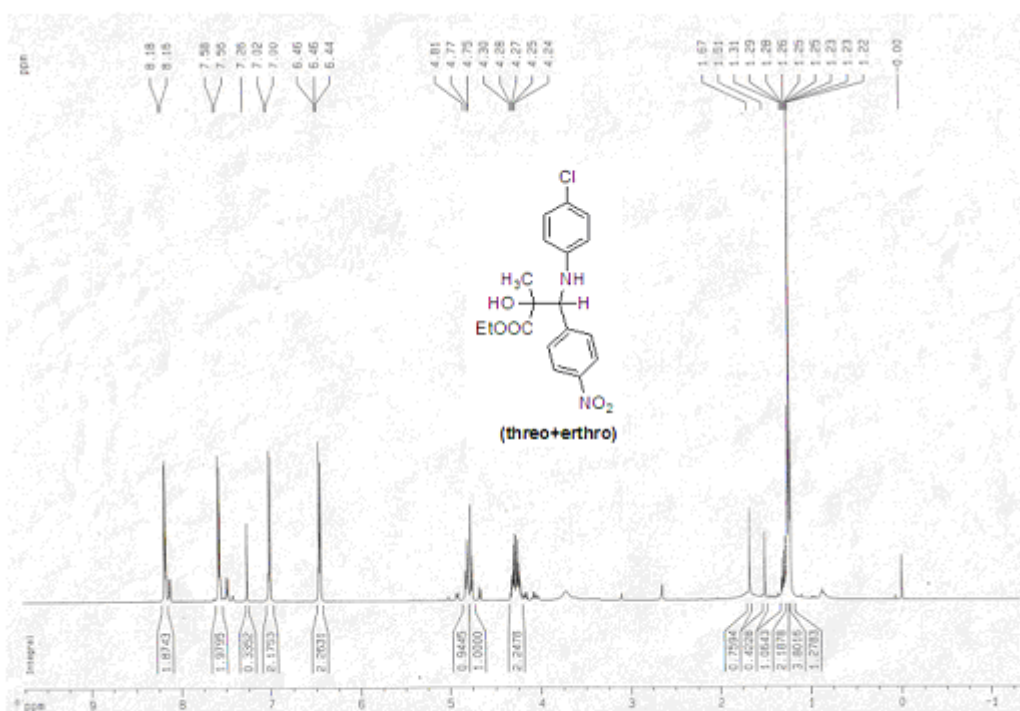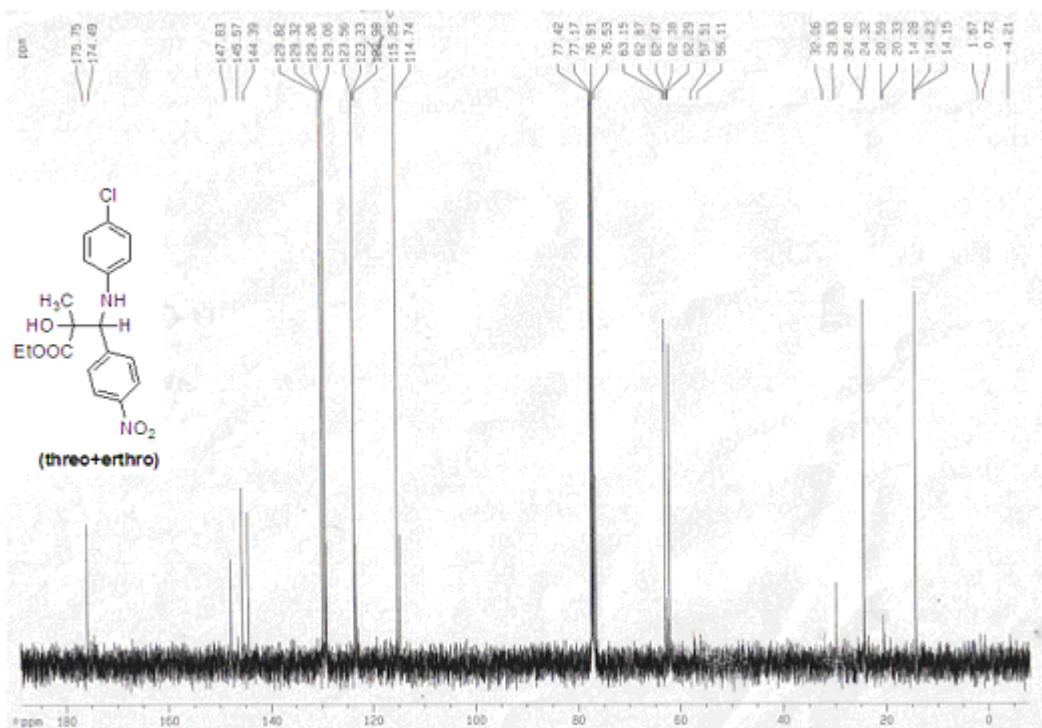

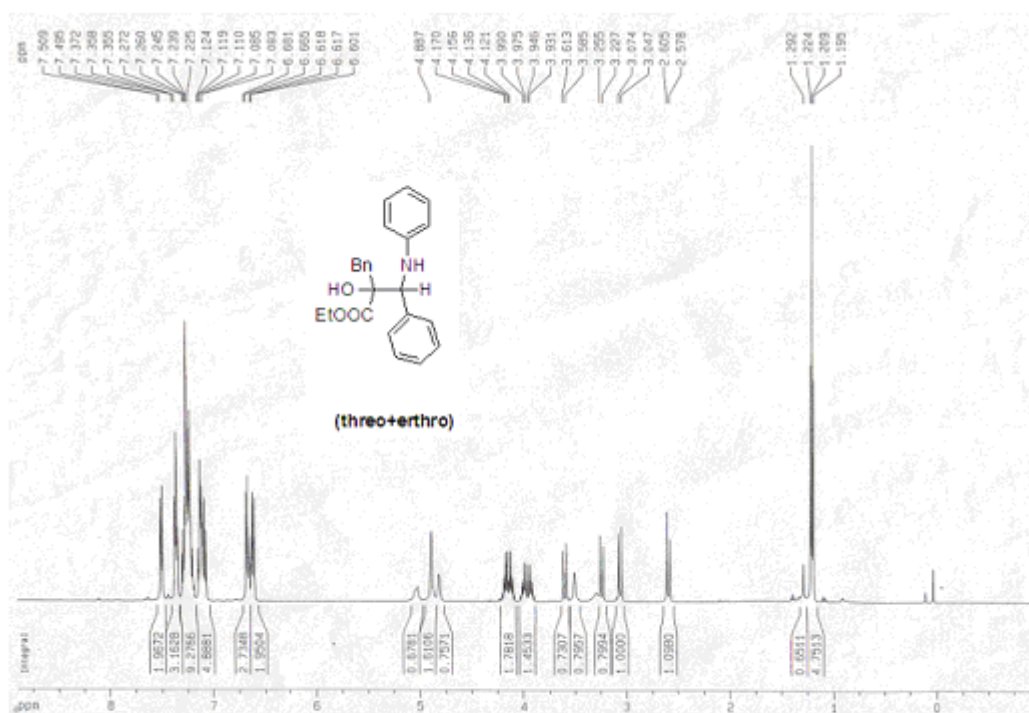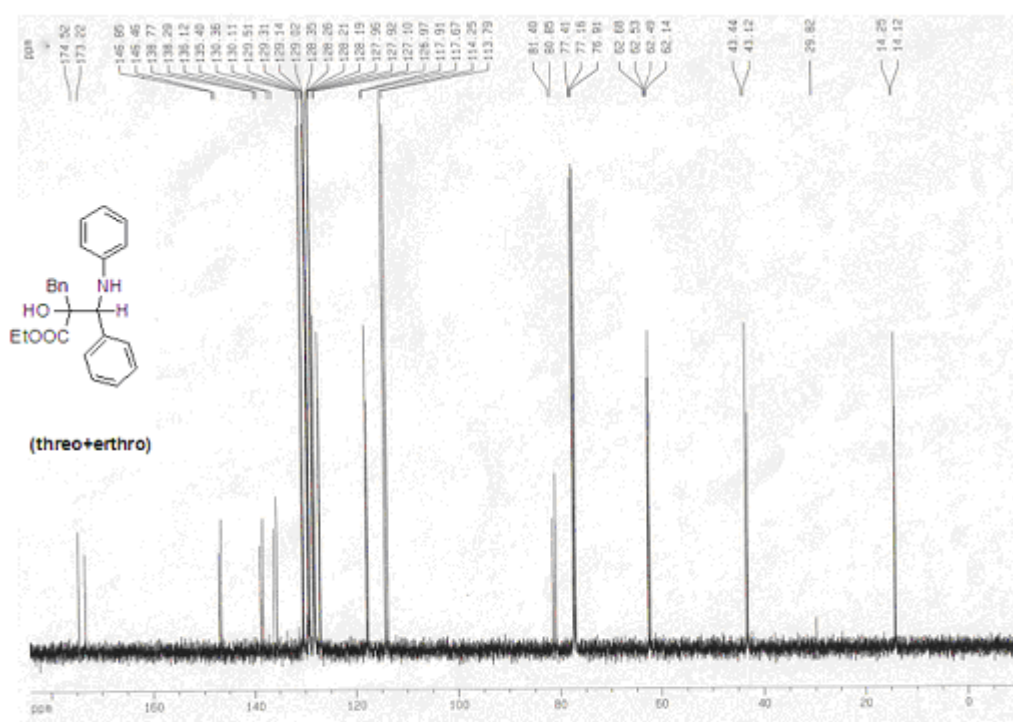

Supplement: b915013g.pdf [file b915013g.pdf]
